# Supplementary material for: Suitable ecological niches of invasive malaria vector under present and projected climatic conditions in South of Iran
Source: Research Square preprint supplement (doi:10.21203/rs.3.rs-4752152/v1), 2024-09-16
Supplement: Supplementary file 1 [file 06738dfbdb27fa8099f938ef.docx]

| Table 1: List of 19 bioclimatic variables used to *Anopheles stephensi* Ecological niche prediction by the maximum entropy model |
| --- |
| | Bio1: Annual Mean Temperature (℃) | | --- | | Bio 2: Mean Diurnal Range (Mean of monthly (max temp – min temp) (℃) | | Bio 3:Isothermality (Bio2/Bio7) x100 (%) | | Bio 4: Temperature Seasonality (standard deviation x100) (℃) | | Bio 5: Max Temperature of Warmest Month (℃) | | Bio 6: Min Temperature of Coldest Month (℃) | | Bio 7: Temperature Annual Range (Bio5–Bio6) (℃) | | Bio 8: Mean Temperature of Wettest Quarter (℃) | | Bio 9: Mean Temperature of Driest Quarter (℃) | | Bio 10: Mean Temperature of Warmest Quarter (℃) | | Bio 11: Mean Temperature of Coldest Quarter (℃) | | Bio 12: Annual Precipitation (mm) | | Bio 13: Precipitation of Wettest Month (mm) | | Bio 14: Precipitation of Driest Month (mm) | | Bio 15: Precipitation Seasonality (Coefficient of Variation) (Fraction) | | Bio 16: Precipitation of Wettest Quarter (mm) | | Bio 17: Precipitation of Driest Quarter (mm) | | Bio 18: Precipitation of Warmest Quarter (mm) | | Bio 19: Precipitation of Coldest Quarter (mm) | |
