# Supplementary material for: Suitable ecological niches of invasive malaria vector under present and projected climatic conditions in South of Iran
Source: Research Square preprint supplement (doi:10.21203/rs.3.rs-4752152/v1), 2024-09-16
Supplement: Supplementary file 2 [file 73168635b989261a4a8a9cdd.docx]

Table 2: Suitable area for​​ *Anopheles stephensi* presence based on MaxEnt modeling results in the current and future years in Hormozgan Province, South of Iran

| ​​ Suitability | Suitable area of *Anopheles stephensi* ​​presence (Km2) | | | | | | | | | |
| --- | --- | --- | --- | --- | --- | --- | --- | --- | --- | --- |
| Current | RCP2.6 | | | RCP4.5 | | | RCP8.5 | | |
| 2030 | 2050 | 2070 | 2030 | 2050 | 2070 | 2030 | 2050 | 2070 |
| Very low* | 24189 | 18750 | 24175 | 24615 | 23819 | 16511 | 22803 | 22214 | 23840 | 22748 |
| Low** | 18969 | 19875 | 18057 | 18294 | 18586 | 23902 | 19951 | 18706 | 17153 | 19084 |
| Moderate*** | 11595 | 12885 | 12865 | 11986 | 13062 | 13705 | 14056 | 13278 | 14828 | 13991 |
| High**** | 11137 | 12560 | 9576 | 10699 | 9819 | 10151 | 9656 | 11800 | 9617 | 9255 |
| Very high***** | 4852 | 6674 | 6071 | 5149 | 5457 | 6475 | 4278 | 4744 | 5306 | 5664 |
| Total | 70743 | 70743 | 70743 | 70743 | 70743 | 70743 | 70743 | 70743 | 70743 | 70743 |

***: 0–20% **: 20–40% ***: 40–60% ****: 60–80% *****: 80-100%**
